# Supplementary material
Source: publisher site journal article supplement (https://www.dovepress.com/article/401768)
Supplement: Supplementary file 1 [file get_supplementary_file.php]

**Appendix-1**

**Questioner for assessing Knowledge, beliefs, awareness, and willingness toward eye donation among ambulance drivers**

English Questionnaire Demographic characteristics:

1. Name (optional)
2. Phone number (optional): \
3. Age ( Years

18–30

30 -40

40-50

>50 YRS OLD

4. Sex:

Male

Female

1. Nationality:
2. Level of Education:

Elementary or middle school

High school

Bachelor

Postgraduate study

1. Questions to determine the level of knowledge:

Do you know what is eye donation

Yes

No

Is eye donation important?

Yes

No

Eyes can be donated after death

Yes

No

Do you know an eye bank exists?

Yes

No

Do you know there is eye shortage in India?

Yes

No

Do you know what is ideal time to donate eyes after death?

Yes

No

Willing to donate eyes?

Yes

No

1. How do you prefer to receive further information about this topic

Mobile phones

Television

News paper

Radio

Poster

Family members

Health worker

Cinema hall

1. Reasons for not donating eyes

Awareness lack

Delaying of religious rights

Dislikes separating the eyes

Objection by family members

Body ill-treated by eye donation

Unsuitability to donate eyes because of health problems

Corneal transplantation yields poor results

1. Reasons for eye donation

Gratifying to help blind person

Eye donation is a virtuous work

Donated eye can give vision to blind

A friend or relative has donated an eye

Influenced by watching movie/ documentary
